# Supplementary material for: Efficient Small Extracellular Vesicles (EV) Isolation Method and Evaluation of EV-Associated DNA Role in Cell–Cell Communication in Cancer
Source: MDPI journal article supplement (doi:10.3390/cancers14092068), 2022-04-20

## Supplementary Figure S1

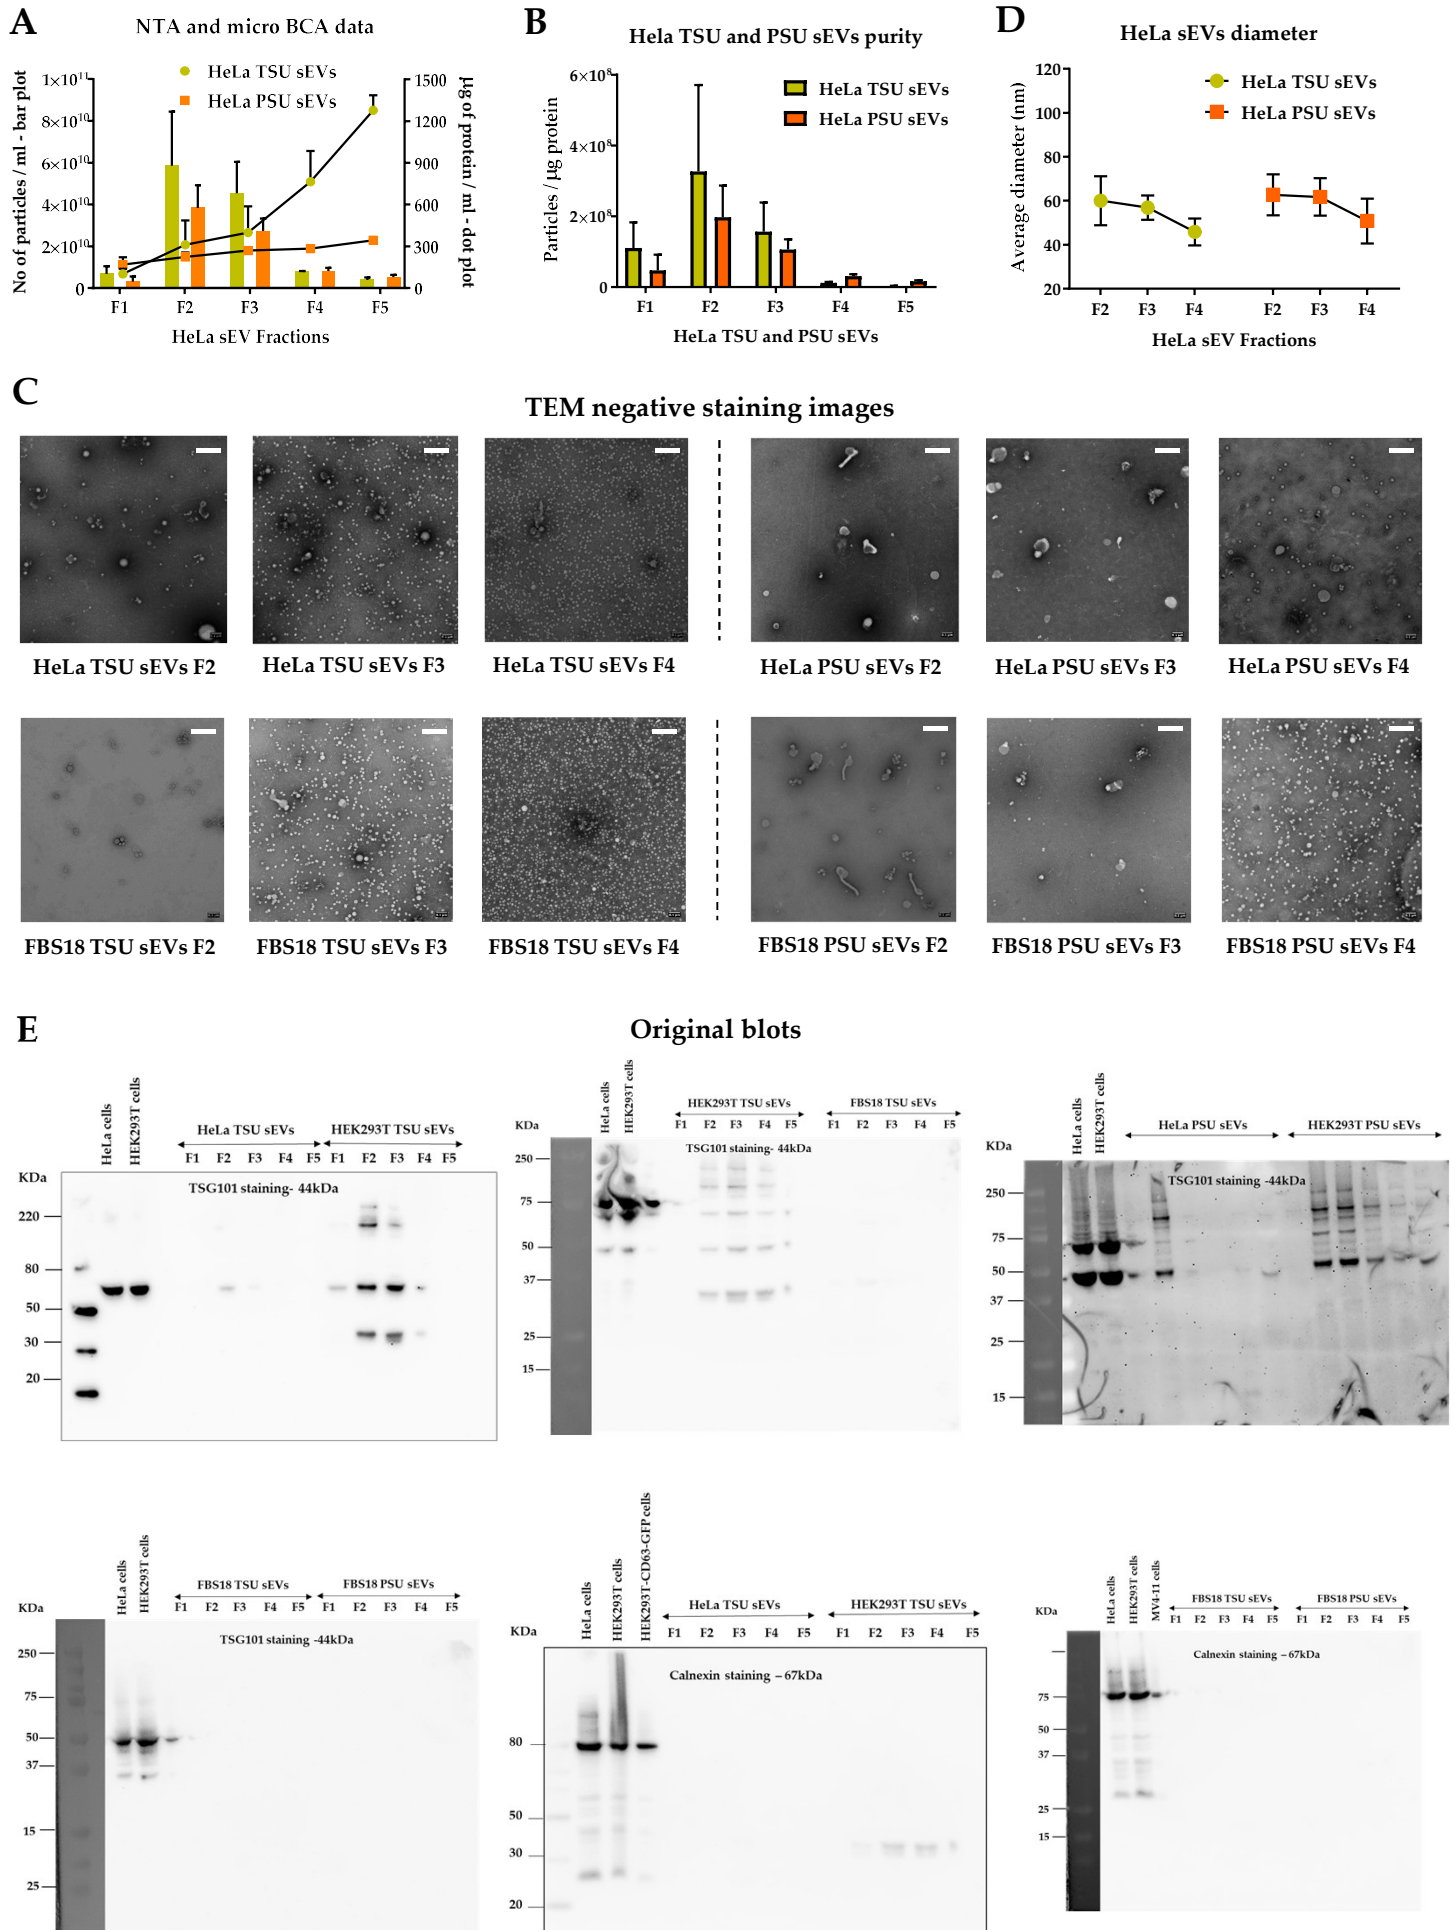

Supp. Figure S1 (contd.)

E

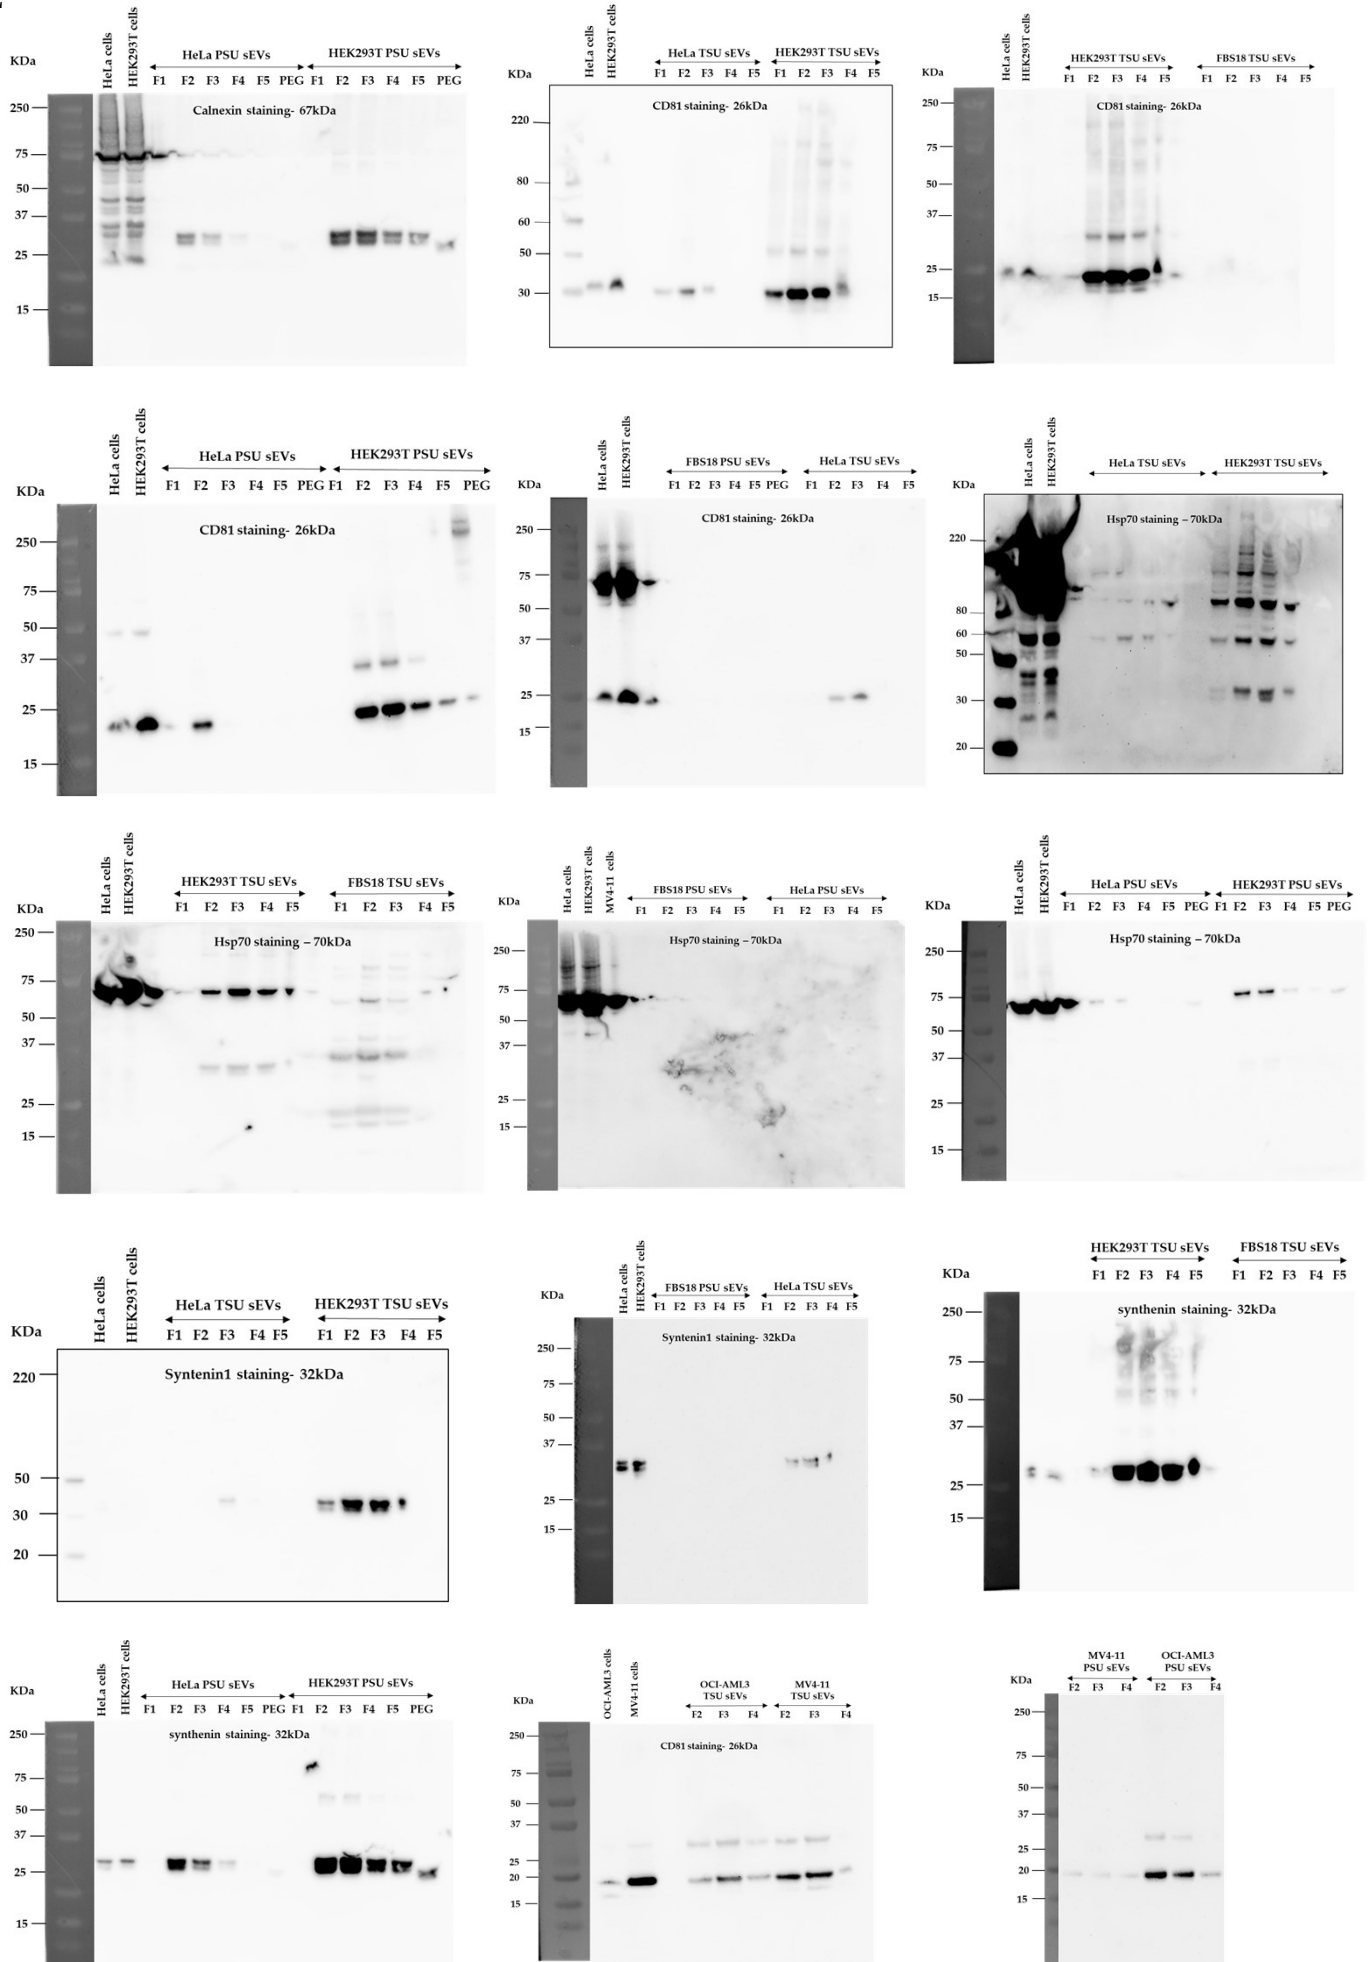

# Supp. Figure S1 (contd.)

E

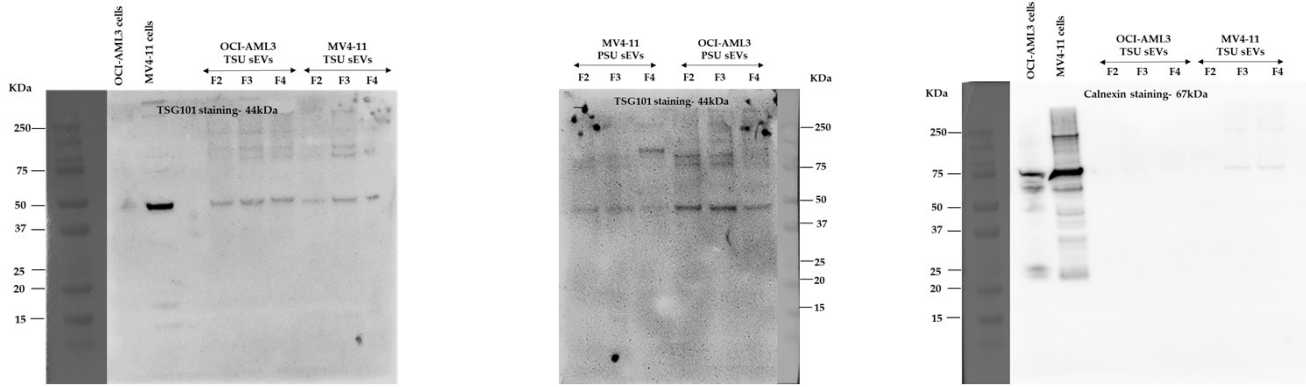

F

Selection of single beads

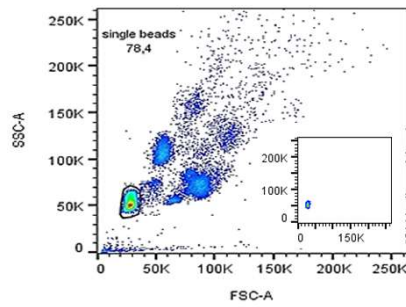

G

Selection of CD9+ population

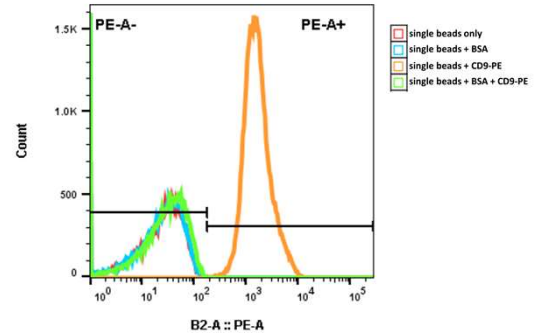

H

Purity based on EV tetraspanins and micro-BCA value

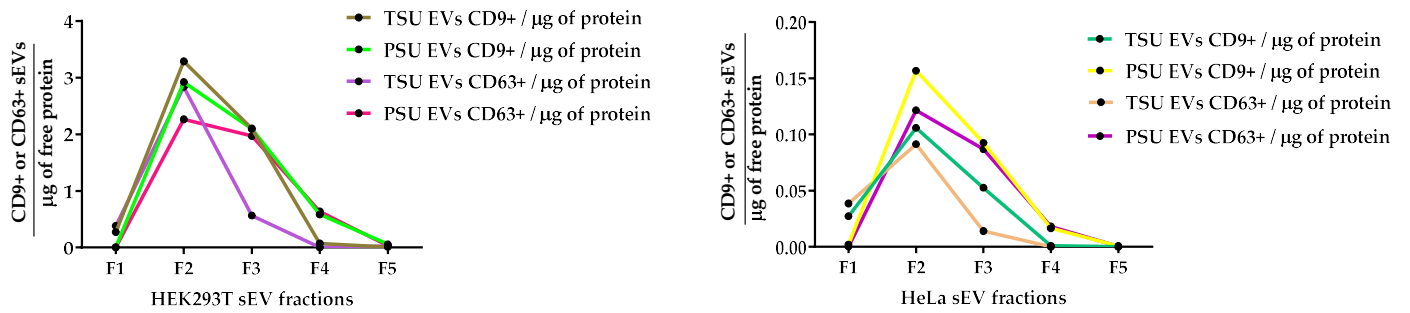

I

DNA concentration

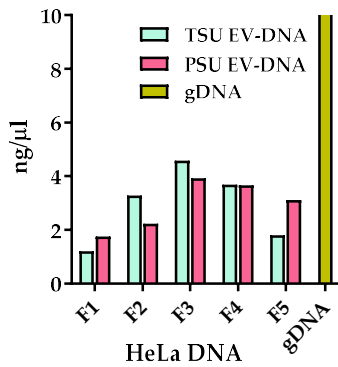

Supplement: s1 [file s1]
